# Supplementary material
Source: Springer Nature journal article supplement (https://www.springermedizin.de/resource/supplementary/12936_2011_2026_MOESM4_ESM.pdf/9543230)

Figure 4.A

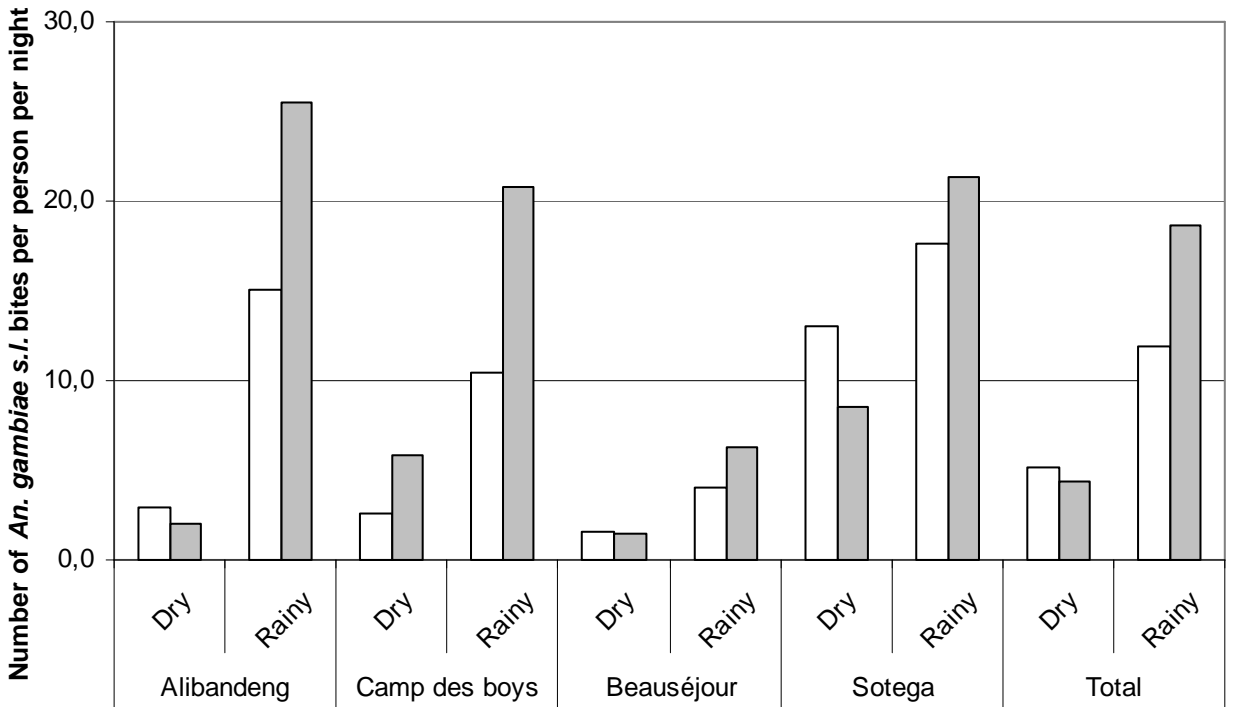

Figure 4.B

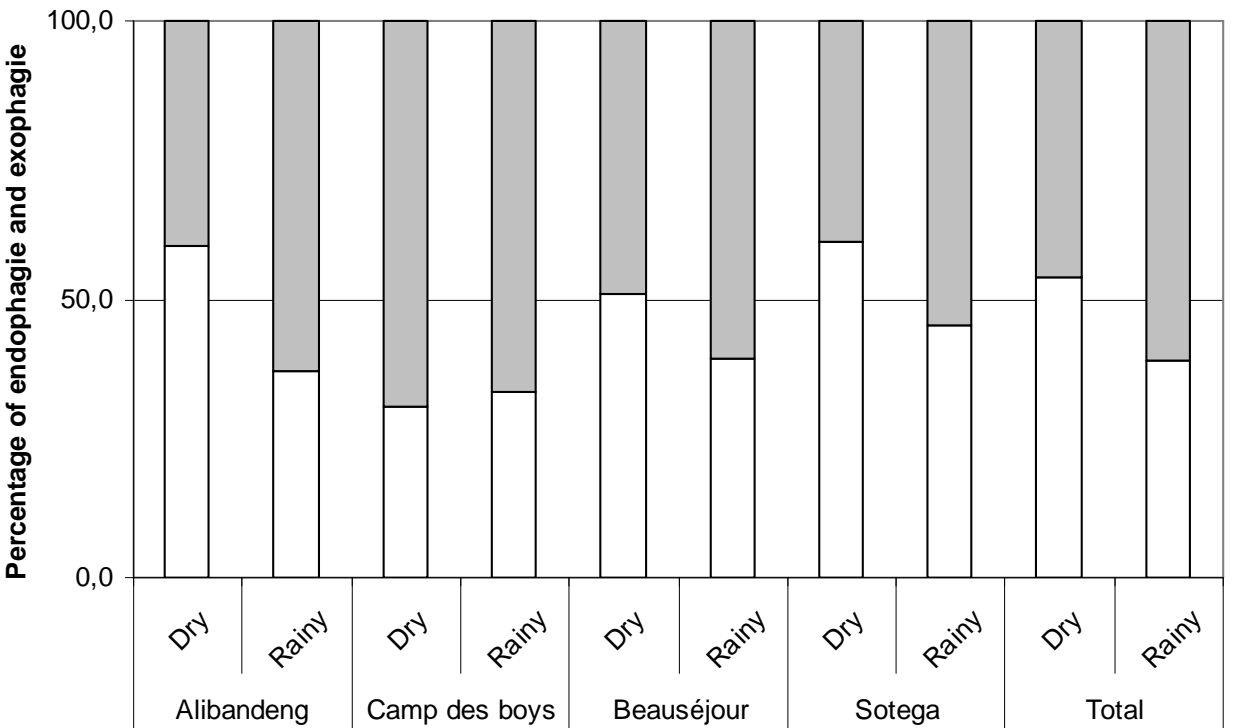

Supplement: MOESM4 [file 9543230]
